# Supplementary material for: Cytotoxic Tumour-Selective 1,5-Diaryl-3-Oxo-1,4-Pentadienes Mounted on a Piperidine Ring
Source: MDPI journal article supplement (doi:10.3390/medicines8120078), 2021-12-16

## SUPPLEMENTAL SECTION

### Cytotoxic tumour-selective 1,5-diaryl-3-oxo-1,4-pentadienes mounted on a piperidine ring

Praveen K. Roayapalley<sup>a,\*</sup>, Hiroshi Sakagami<sup>b</sup>, Keitaro Satoh<sup>b</sup>, Shigeru Amano<sup>b</sup>, Kenjiro Bandow<sup>b</sup>, Renato J. Aguilera<sup>c</sup>, Karla G. Cano Hernandez<sup>c</sup>, Austre Y. Schiaffino Bustamante<sup>c</sup>, Stephen G. Dimmock<sup>d</sup>, Rajendra K. Sharma<sup>c</sup>, Umashankar Das<sup>a</sup>, Jonathan R. Dimmock<sup>a</sup>

1. Percentage yields, melting points, <sup>1</sup>H and <sup>13</sup>C NMR spectra, and mass spectra of **2a-u**.....S2.
2. Percentage yields, melting points, <sup>1</sup>H NMR and mass spectra of **3a-d** and <sup>13</sup>C NMR spectra of **3b-d**..... S6.
3. Figure S1.....S7.
4. Figure S2.....S8.
5. QSAR.....S9.

## 1. Percentage yields, melting points, <sup>1</sup>H and <sup>13</sup>C NMR spectra and mass spectra of 2a-u.

### 1.1 3,5-bis(benzylidene)-4-piperidone (**2a**)<sup>1</sup>

Yield: 89%; mp: 177-179 °C (lit 177-178 °C)<sup>1</sup>; <sup>1</sup>H NMR (500 MHz, DMSO-*d*<sub>6</sub>) δ ppm 4.25 (br s, 4 H) 7.44-7.54 (m, 10 H) 7.76 (s, 2 H). <sup>13</sup>C NMR (125 MHz, DMSO-*d*<sub>6</sub>) δ ppm 47.61, 128.67, 129.06, 130.47, 133.73, 134.92, 136.05, 187.70. MS (FD) *m/z* found: 275.1319, calculated *m/z*: 275.1310.

### 1.2 3,5-bis(2-methoxybenzylidene)-4-piperidone (**2b**)

Yield: 68%; mp: 235-236 °C; <sup>1</sup>H NMR (500 MHz, DMSO-*d*<sub>6</sub>) δ ppm 3.87 (s, 6 H) 4.34 (s, 4 H) 7.08 (t, *J*=7.5 Hz, 2 H) 7.16 (d, *J*=8.2 Hz, 2 H) 7.26 - 7.34 (m, 2 H) 7.46 - 7.54 (m, 2 H) 8.03 (s, 2 H). <sup>13</sup>C NMR (125 MHz, DMSO-*d*<sub>6</sub>) δ ppm 44.06, 55.74, 111.61, 120.46, 122.24, 127.67, 130.22, 132.05, 135.11, 158.11, 182.44. MS (FD) *m/z* found: 335.1528, calculated *m/z*: 335.1521.

### 1.3 3,5-bis(3-methoxybenzylidene)-4-piperidone (**2c**)<sup>2</sup>

Yield: 79%; mp: 195-197 °C (lit 194-196 °C)<sup>2</sup>; <sup>1</sup>H NMR (500 MHz, DMSO-*d*<sub>6</sub>) δ ppm 3.80 (s, 6 H) 3.99 (s, 4 H) 6.97 - 7.06 (m, 6 H) 7.38 (t, *J*=7.9 Hz, 2 H) 7.56 (s, 2 H). <sup>13</sup>C NMR (125 MHz, DMSO-*d*<sub>6</sub>) δ ppm 44.2, 55.1, 115.5, 115.7, 122.4, 128.8, 129.9, 134.8, 138.4, 159.2, 182.7. MS (FD) *m/z* found: 335.1519, calculated *m/z*: 335.1521.

### 1.4 3,5-bis(4-methoxybenzylidene)-4-piperidone (**2d**)<sup>3</sup>

Yield: 84%; mp: 184-185 °C (lit 182-184.6 °C)<sup>3</sup>; <sup>1</sup>H NMR (500 MHz, DMSO-*d*<sub>6</sub>) δ ppm 3.80 (s, 6 H) 3.96 (s, 4 H) 7.02 (d, *J*=8.8 Hz, 4 H) 7.44 (d, *J*=8.8 Hz, 4 H) 7.53 (s, 2 H). <sup>13</sup>C NMR (125 MHz, DMSO-*d*<sub>6</sub>) δ ppm 47.67, 55.29, 114.21, 127.55, 132.35, 133.38, 134.00, 159.87, 187.29. MS (FD) *m/z* found: 335.1512, calculated *m/z*: 335.1521.

### 1.5 3,5-bis(3,4-dimethoxybenzylidene)-4-piperidone (**2e**)<sup>3</sup>

Yield: 73%; mp: 161-163 °C (lit: 162.2-165.4 °C)<sup>3</sup>; <sup>1</sup>H NMR (500 MHz, DMSO-*d*<sub>6</sub>) δ ppm 3.81 (d, *J*=1.3 Hz, 12 H) 4.01 (s, 4 H) 7.05 (s, 4 H) 7.08 (s, 2 H) 7.54 (s, 2 H). <sup>13</sup>C NMR (125 MHz, DMSO-*d*<sub>6</sub>) δ ppm 47.66, 55.52, 55.54, 111.59, 114.05, 123.90, 127.79, 133.88, 134.12, 148.50, 149.68, 187.24. MS (FD) *m/z* found: 395.1735, calculated *m/z*: 395.1733.

### 1.6 3,5-bis(2,5-dimethoxybenzylidene)-4-piperidone (**2f**)<sup>2</sup>

Yield: 53%; mp: 136-137 °C (lit 133-137 °C)<sup>2</sup>; <sup>1</sup>H NMR (500 MHz, DMSO-*d*<sub>6</sub>) δ ppm 3.76 (s, 6 H) 3.81 (s, 6 H) 4.32 (br s, 4 H) 6.84 (br s, 2 H) 7.08 (br s, 4 H) 7.94 (br s, 2 H). <sup>13</sup>C NMR (125 MHz, DMSO-*d*<sub>6</sub>) δ ppm 44.04, 55.67, 56.08, 112.59, 115.74, 116.63, 122.84, 128.04, 135.06, 152.29, 152.73, 182.35. MS (FD) *m/z* found: 395.1735, calculated *m/z*: 395.1733.

1.7 3,5-bis(2,4,6-trimethoxybenzylidene)-4-piperidone (**2g**)<sup>3</sup>

Yield: 43%; mp: 153-156 °C (lit: 152.3-156.1 °C)<sup>3</sup>; <sup>1</sup>H NMR (500 MHz, DMSO-*d*<sub>6</sub>) δ ppm 3.38 (s, 4 H) 3.78 (s, 12 H) 3.81 (s, 6 H) 6.27 (s, 4 H) 7.36 (s, 2 H). <sup>13</sup>C NMR (125 MHz, DMSO-*d*<sub>6</sub>) δ ppm 48.72, 55.42, 55.57, 90.64, 105.26, 126.47, 136.26, 158.87, 162.12, 187.51. MS (FD) *m/z* found: 455.1956, calculated *m/z*: 455.1944.

1.8 3,5-bis(3,4,5-trimethoxybenzylidene)-4-piperidone (**2h**)<sup>3</sup>

Yield: 76%; mp: 190-192 °C (lit: 193.7-194 °C)<sup>3</sup>; <sup>1</sup>H NMR (500 MHz, CDCl<sub>3</sub>-*d*) δ ppm 3.82 (s, 12 H) 3.88 (s, 6 H) 4.52 (br s, 4 H) 6.52 (s, 4 H) 7.88 (s, 2 H) 10.31 (br s, 1 H). <sup>13</sup>C NMR (125 MHz, DMSO-*d*<sub>6</sub>) δ ppm 43.99, 56.18, 60.23, 108.47, 127.09, 129.22, 139.51, 152.94, 182.20. MS (FD) *m/z* found: 455.1952, calculated *m/z*: 455.1944.

1.9 3,5-bis(benzo[*d*][1,3]dioxol-5-ylmethylene)-4-piperidone (**2i**)<sup>2</sup>

Yield: 89%; mp: 220-222 °C (lit 218-220 °C)<sup>2</sup>; <sup>1</sup>H NMR (500 MHz, DMSO-*d*<sub>6</sub>) δ ppm 3.95 (br s, 4 H) 6.09 (s, 4 H) 7.01 (d, *J*=0.9 Hz, 4 H) 7.05 (s, 2 H) 7.49 (s, 2 H). <sup>13</sup>C NMR (125 MHz, DMSO-*d*<sub>6</sub>) δ ppm 48.13, 102.00, 109.06, 110.51, 126.28, 129.61, 134.08, 134.94, 148.08, 148.51, 186.54. MS (FD) *m/z* found: 363.1107, calculated *m/z*: 363.1107.

1.10 3,5-bis(2-fluorobenzylidene)-4-piperidone (**2j**)<sup>3</sup>

Yield: 89%; mp: 140-142 °C (lit: 139.6-142.5 °C)<sup>3</sup>; <sup>1</sup>H NMR (500 MHz, DMSO-*d*<sub>6</sub>) δ ppm 3.96 (s, 4 H) 6.79 - 6.92 (m, 6 H) 7.25 (t, *J*=7.9 Hz, 2 H) 7.47 (s, 2 H). <sup>13</sup>C NMR (125 MHz, DMSO-*d*<sub>6</sub>) δ ppm 47.49, 115.65, 115.82, 122.48, 122.58, 124.56, 124.58, 125.82, 125.85, 131.09, 131.39, 131.46, 137.61, 159.44, 161.42, 187.17. MS (FD) *m/z* found: 311.1112, calculated *m/z*: 311.1122.

1.11 3,5-bis(3-fluorobenzylidene)-4-piperidone (**2k**)

Yield: 84%; mp: 166-167 °C; <sup>1</sup>H NMR (500 MHz, DMSO-*d*<sub>6</sub>) δ ppm 3.98 (s, 4 H) 7.22 - 7.28 (m, 2 H) 7.32 (d, *J*=7.6 Hz, 4 H) 7.48 - 7.53 (m, 2 H) 7.56 (s, 2 H). <sup>13</sup>C NMR (125 MHz, DMSO-*d*<sub>6</sub>) δ ppm 44.15, 117.32, 117.62, 127.12, 129.46, 131.51, 136.41, 138.39, 161.00, 164.24, 182.79. MS (FD) *m/z* found: 311.1125, calculated *m/z*: 311.1122.

1.12 3,5-bis(4-fluorobenzylidene)-4-piperidone (**2l**)<sup>1</sup>

Yield: 91%; mp: 209-211 °C (lit: 212-213 °C)<sup>1</sup>; <sup>1</sup>H NMR (500 MHz, DMSO-*d*<sub>6</sub>) δ ppm 4.50 (s, 4 H) 7.31 - 7.45 (m, 4 H) 7.56 - 7.68 (m, 4 H) 7.87 (s, 2 H) 9.85 (br s, 2 H). <sup>13</sup>C NMR (125 MHz, DMSO-*d*<sub>6</sub>) δ ppm 43.66, 115.98, 116.16, 127.70, 130.34, 133.13, 138.06, 161.83, 163.81, 182.32. MS (FD) *m/z* found: 311.1110, calculated *m/z*: 311.1122.

*1.13 3,5-bis(3,4-difluorobenzylidene)-4-piperidone (2m)*

Yield: 77%; mp: 199-199 °C; <sup>1</sup>H NMR (500 MHz, DMSO-*d*<sub>6</sub>) δ ppm 3.97 (s, 4 H) 7.33 - 7.38 (m, 2 H) 7.49 - 7.56 (m, 4 H) 7.60 (dd, *J*=12.0, 8.0 Hz, 1 H) 7.60 (dd, *J*=12.0, 8.0 Hz, 1 H). <sup>13</sup>C NMR (125 MHz, DMSO-*d*<sub>6</sub>) δ ppm 47.29, 117.71, 119.36, 127.79, 131.71, 132.58, 136.77, 148.54, 150.62, 187.45 MS (FD) *m/z* found: 347.0932, calculated *m/z*: 347.0933.

*1.14 3,5-bis(2,6-difluorobenzylidene)-4-piperidone (2n)*

Yield: 81%; mp: 196-198 °C; <sup>1</sup>H NMR (500 MHz, DMSO-*d*<sub>6</sub>) δ ppm 3.60 (br. s., 4 H) 7.22 (t, *J*=8.2 Hz, 4 H) 7.37 (s, 2 H) 7.49 - 7.60 (m, 2 H). <sup>13</sup>C NMR (125 MHz, DMSO-*d*<sub>6</sub>) δ ppm 48.08, 112.22, 112.34, 112.53, 121.29, 152.37, 182.75 MS (FD) *m/z* found: 347.0947, calculated *m/z*: 347.0933.

*1.15 3,5-bis(2-methylbenzylidene)-4-piperidone (2o)*

Yield: 91%; mp: 134-136 °C; <sup>1</sup>H NMR (500 MHz, DMSO-*d*<sub>6</sub>) δ ppm 2.31 (s, 6 H) 3.81 (s, 4 H) 7.19 - 7.23 (m, 2 H) 7.24 - 7.32 (m, 6 H) 7.73 (s, 2 H). <sup>13</sup>C NMR (125 MHz, DMSO-*d*<sub>6</sub>) δ ppm 19.63, 47.48, 125.72, 128.91, 129.24, 130.28, 132.50, 133.83, 136.07, 137.61, 187.68 MS (FD) *m/z* found: 303.1632, calculated *m/z*: 303.1623

*1.16 3,5-bis(2-nitrobenzylidene)-4-piperidone hydrochloride (2p)*

Yield: 86%; mp: 220-221 °C; <sup>1</sup>H NMR (500 MHz, DMSO-*d*<sub>6</sub>) δ ppm 4.23 (d, *J*=1.6 Hz, 4 H) 7.57 (d, *J*=7.6 Hz, 2 H) 7.74 - 7.79 (m, 2 H) 7.91 (td, *J*=7.6, 1.3 Hz, 2 H) 8.17 (s, 2 H) 8.29 (dd, *J*=8.4, 1.1 Hz, 2 H) 9.49 (br s, 1 H). <sup>13</sup>C NMR (125 MHz, DMSO-*d*<sub>6</sub>) δ ppm 43.48, 125.29, 128.65, 129.62, 130.70, 130.80, 134.42, 137.51, 147.46, 182.18. MS (FD) *m/z* found: 366.1095, calculated *m/z*: 365.1012.

*1.17 3,5-bis(4-hydroxy-3-methoxybenzylidene)-4-piperidone (2q)*

Yield: 74%; mp: 199-202 °C; <sup>1</sup>H NMR (500 MHz, DMSO-*d*<sub>6</sub>) δ ppm 3.82 (s, 6 H) 3.99 (s, 4 H) 6.85 (br s, 2 H) 6.94 (dd, *J*=8.4, 1.7 Hz, 2 H) 7.04 (d, *J*=1.9 Hz, 2 H) 7.51 (s, 2 H). <sup>13</sup>C NMR (125 MHz, DMSO-*d*<sub>6</sub>) δ ppm 44.03, 55.76, 115.57, 124.70, 124.76, 125.21, 139.55, 147.74, 149.22, 181.89. MS (FD) *m/z* found: 367.1426, calculated *m/z*: 367.1420.

*1.18 3,5-bis(3-hydroxy-4-methoxybenzylidene)-4-piperidone (2r)*

Yield: 79%; mp: 249 °C (decomposed); <sup>1</sup>H NMR (500 MHz, DMSO-*d*<sub>6</sub>) δ ppm 3.85 (s, 6 H) 4.42 (s, 4 H) 6.96 (s, 2 H) 7.00 (dd, *J*=8.5, 1.9 Hz, 2 H) 7.08 (d, *J*=8.5 Hz, 2 H) 7.71 (s, 2 H) 9.40 (br s, 2 H). <sup>13</sup>C NMR (125 MHz, DMSO-*d*<sub>6</sub>) δ ppm 45.33, 55.69, 112.20, 117.15, 123.61, 125.94, 126.61, 138.85, 146.64, 149.67, 182.35. MS (FD) *m/z* found: 367.1433, calculated *m/z*: 367.1420.

*1.19 3,5-bis(4-hydroxybenzylidene)-4-piperidone (2s)*<sup>3</sup>

Yield: 67%; mp >260 °C ((lit: 298.5 °C)<sup>3</sup>; <sup>1</sup>H NMR (500 MHz, DMSO-*d*<sub>6</sub>) δ ppm 4.46 (s, 4 H) 6.89 - 6.93 (m, 4 H) 7.38 (d, *J*=8.5 Hz, 4 H) 7.78 (s, 2 H) 10.40 (br s, 1 H). <sup>13</sup>C NMR (125 MHz, DMSO-*d*<sub>6</sub>) δ ppm 44.0, 116.0, 124.6, 124.7, 133.0, 139.1, 159.6, 182.0. MS (FD) *m/z* found: 307.1211, calculated *m/z*: 307.1208.

*1.20 3,5-bis(3-hydroxybenzylidene)-4-piperidone (2t)*<sup>2</sup>

Yield: 39%; mp: 224-227 °C (lit: 226-230 °C)<sup>2</sup>; <sup>1</sup>H NMR (500 MHz, DMSO-*d*<sub>6</sub>) δ ppm 3.94 (s, 4 H) 6.80 (dd, *J*=8.0, 1.7 Hz, 2 H) 6.83 (s, 2 H) 6.88 (d, *J*=7.9 Hz, 2 H) 7.23 - 7.27 (m, 2 H) 7.46 (s, 2 H). <sup>13</sup>C NMR (125 MHz, DMSO-*d*<sub>6</sub>) δ ppm 48.14, 116.76, 117.30, 121.83, 130.10, 134.37, 135.86, 136.28, 158.03, 188.12. MS (FD) *m/z* found: 307.1213, calculated *m/z*: 307.1208.

*1.21 3,5-bis(2-chlorobenzylidene)-4-piperidone (2u)*

Yield: 83%; mp: 226-227 °C; <sup>1</sup>H NMR (500 MHz, DMSO-*d*<sub>6</sub>) δ ppm 4.37 (d, *J*=1.9 Hz, 4 H) 7.46 - 7.55 (m, 6 H) 7.64 - 7.66 (m, 2 H) 8.00 (s, 2 H) 9.56 (br s, 1 H). <sup>13</sup>C NMR (125 MHz, DMSO-*d*<sub>6</sub>) δ ppm 43.65, 127.57, 129.72, 130.00, 130.82, 131.63, 131.71, 134.11, 135.86, 182.24. MS (FD) *m/z* found: 344.0596, calculated *m/z*: 343.0531.

## References:

1. Dimmock J. R, Padmanilayam M. P, Puthucode R. N, Nazarali A. J, Motaganahalli N. L, Zello G. A, Quail J. W, Oloo E. O, Kraatz H. B, Prisciak J. S. A conformational and structure-activity relationship study of cytotoxic 3,5-bis(arylidene)-4-piperidones and related N-acryloyl analogues. *J. Med. Chem.* 44 (2001) 586-593.
2. Gregory M, Dandavati A, Lee M, Tzou S, Savagian M, Brien K. A, Satam V, Patil P, Lee M. Synthesis, cytotoxicity, and structure-activity insight of NH- and N-methyl-3,5-bis-(arylidényl)-4-piperidones. *Med. Chem. Res.* 22 (2013) 5588-5597.
3. Wu J, Zhang Y, Cai Y, Wang J, Weng B, Tang Q, Chen X, Pan Z, Liang G, Yang S. Discovery and evaluation of piperid-4-one-containing mono-carbonyl analogs of curcumin as anti-inflammatory agents. *Bioorg. & Med. Chem.* 21 (2013) 3058-3065.

## 2. Percentage yields, melting points, <sup>1</sup>H NMR and mass spectra of 3a-d and <sup>13</sup>C NMR spectra of 3b-d.

### 2.1 (1E,4E)-1,5-bis(4-Methoxyphenyl)penta-1,4-dien-3-one (3a)<sup>1</sup>

Yield: 37%; mp: 120-122 °C (lit 121-122°C)<sup>1</sup>; <sup>1</sup>H NMR (500 MHz, DMSO-*d*<sub>6</sub>) δ ppm 3.80 (s, 6 H) 7.01 (d, *J*=8.8 Hz, 4 H) 7.20 (s, 1 H) 7.17 (s, 1 H) 7.71 (s, 1 H) 7.72 - 7.75 (m, 5 H). MS (FD) *m/z* found: 294.1271, calculated *m/z*: 294.1256.

### 2.2 (1E,4E)-1,5-Diphenylpenta-1,4-dien-3-one (3b)<sup>2</sup>

Yield: 22 %; mp: 110-112 °C (lit 110-112 °C)<sup>2</sup>; <sup>1</sup>H NMR (500 MHz, DMSO-*d*<sub>6</sub>) δ ppm 7.09 (d, *J*=15.9 Hz, 2H), 7.37 – 7.46 (m, 6H), 7.58 – 7.65 (m, 4H), 7.74 (d, *J*=15.9 Hz, 2H). <sup>13</sup>C NMR (125 MHz, CDCl<sub>3</sub>) 125.69, 128.62, 129.21, 130.74. 135.81, 143.56, 189.11. MS (FD) *m/z* found: 234.1057, calculated *m/z*: 234.1045.

### 2.3 (1E,4E)-1,5-bis(4-Chlorophenyl)penta-1,4-dien-3-one (3c)<sup>1</sup>

Yield: 41%; mp: 192-193 °C (lit 192-193 °C)<sup>1</sup>; <sup>1</sup>H NMR (500 MHz, CDCl<sub>3</sub>) δ ppm 7.04 (d, *J*=15.9 Hz, 2 H), 7.40 (dd, *J*=8.6 Hz, 4 H), 7.56 (d, *J*=8.6 Hz, 4 H), 7.70 (d, *J*=15.9 Hz, 2 H). <sup>13</sup>C NMR (125 MHz, CDCl<sub>3</sub>) δ 126.0, 128.7, 128.7, 129.3, 129.3, 133.3, 136.5, 142.1, 188.3. MS (FD) *m/z* found: 302.0279, calculated *m/z*: 302.0265.

### 2.4 (1E,4E)-1,5-bis(4-Fluorophenyl)penta-1,4-dien-3-one (3d)<sup>2</sup>

Yield: 29%; mp: 146-148 °C (lit 150-152° C)<sup>2</sup>; <sup>1</sup>H NMR (500 MHz, CDCl<sub>3</sub>) δ ppm 7.00 (d, *J*=15.9 Hz, 2 H), 7.11 (dd, *J*=8.7 Hz, 4 H), 7.60 (d, *J*=8.7 Hz, 4 H), 7.71 (d, *J*=15.9 Hz, 2 H). <sup>13</sup>C NMR (125 MHz, CDCl<sub>3</sub>) δ 115.8, 125.4, 130.8, 141.5, 161.6, 164.9, 188.3. MS (FD) *m/z* found: 270.094, calculated *m/z*: 270.085.

## References:

1. Wei X, Du Z.-Y, Zheng X, Cui X.-X, Conney A. H, Zhang K. Synthesis and evaluation of curcumin-related compounds for anticancer activity. Eur. J. Med. Chem. 53 (2012) 235-245.
2. Weber W. M, Hunsaker L. A, Roybal C. N, Bobrovnikova-Marjon E. V, Abcouwer S. F, Royer R. E, Deck L. M, Vander Jagt D. L. Activation of NFκB is inhibited by curcumin and related enones. Bioorg. & Med. Chem. 14 (2006) 2450-2461.

**Figure S1.** Raw data of full Western blot of **2e,r**. Protein(9  $\mu$ g) was loaded to each lane.

lane 1: control

lane 2: actinomycin D (1  $\mu$ M)

lane 3: **2e** (0.3  $\mu$ M)

lane 4: **2e** (1  $\mu$ M)

lane 5: **2r** (1  $\mu$ M)

lane 6: **2r** (3  $\mu$ M)

**A** Membrane after detection by ECL plus (cytiva)

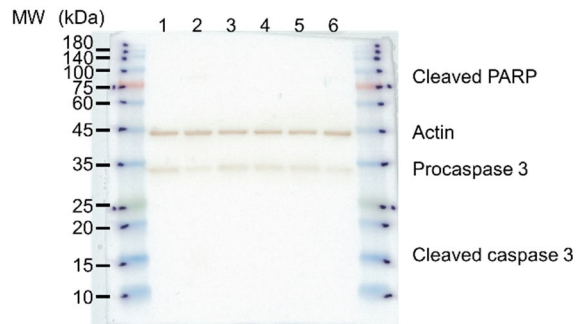

**B** Short exposure (0.137 sec)

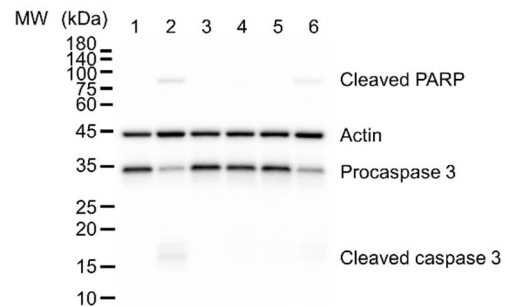

**C** Long exposure (1.820 sec)

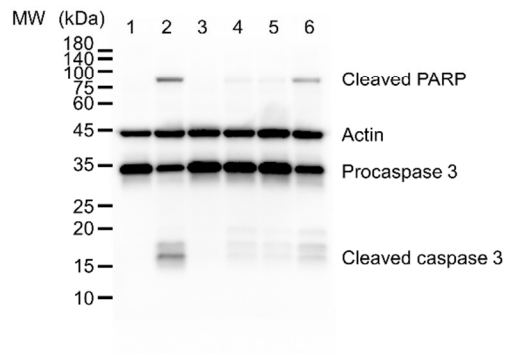

**D** Long exposure (1.820 sec, Contrast-adjusted)

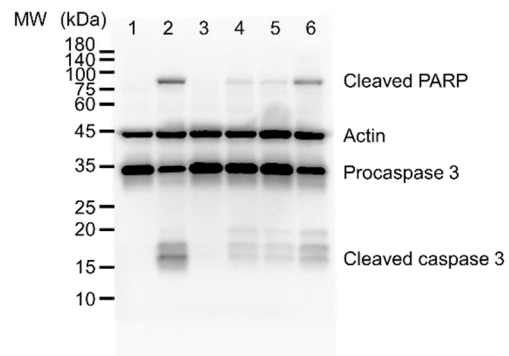

**Figure S2.** Representative cell cycle distribution patterns in one of triplicate samples in Table 5. Ca9-22 cells were incubated for 24 h without (control) or with the indicated concentrations of test compounds (upper panel). Pictures of morphologies of the cells before cell harvest are shown in lower panel. Reproducible morphological changes were confirmed.

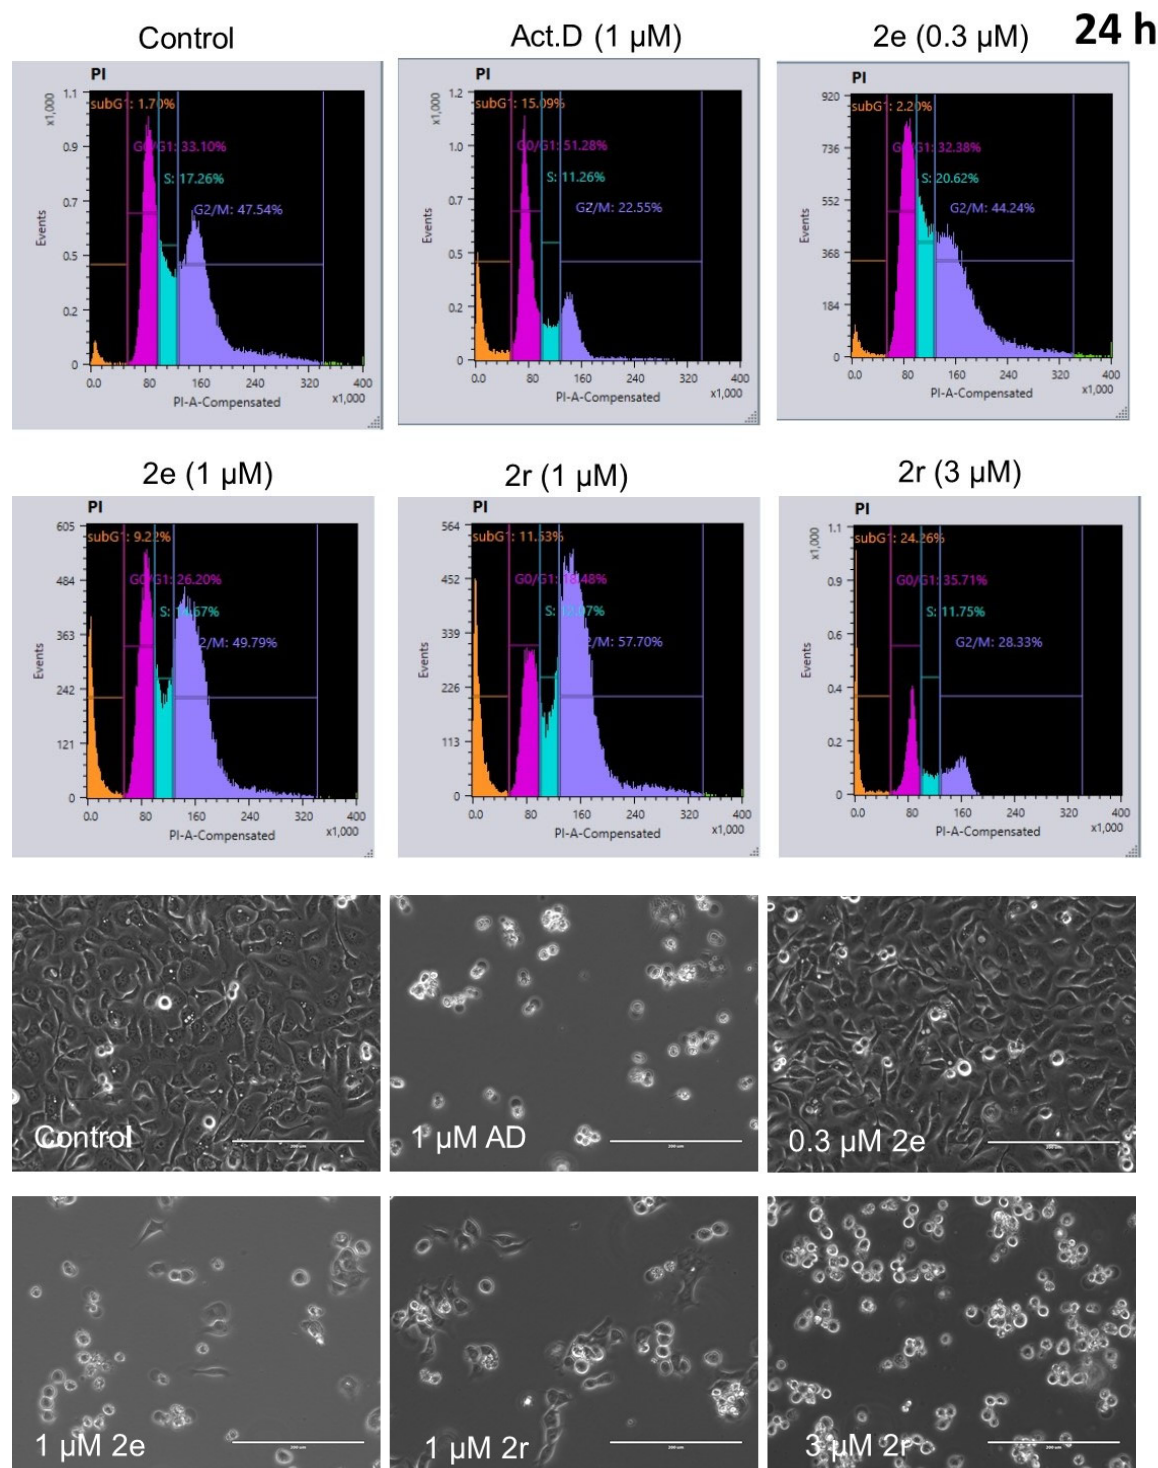



## QSAR.

Linear and semilogarithmic plots were made between the  $\sigma/\sigma^*$ ,  $\pi$  and MR values of the aryl substituents in **2a-u** and the average CC<sub>50</sub> values. A summary of the results are presented in Tables S1 and S2. In addition, the six plots which produced these data are portrayed in Figures S3-S8 of this supplementary section.

**Table S1.** Linear determinations between the average CC<sub>50</sub> values (in  $\mu\text{M}$ ) and various physicochemical parameters.

| Physicochemical parameter | p value | Correlation (+ or -) |
|---------------------------|---------|----------------------|
| $\sigma/\sigma^*$         | 0.021   | Negative correlation |
| $\pi$                     | 0.464   | Negative correlation |
| MR                        | 0.326   | Positive correlation |

**Table S2.** Semilogarithmic determinations between the average CC<sub>50</sub> values (in  $\mu\text{M}$ ) and various physicochemical parameters.

| Physicochemical parameter | p value | Correlation (+ or -) |
|---------------------------|---------|----------------------|
| $\sigma/\sigma^*$         | 0.170   | Negative correlation |
| $\pi$                     | 0.441   | Negative correlation |
| MR                        | 0.689   | Negative correlation |

**Figure S3.** Linear determinations between the average CC<sub>50</sub> values (in  $\mu\text{M}$ ) and  $\sigma/\sigma^*$

| Correlations                               |                     |                                            |                   |
|--------------------------------------------|---------------------|--------------------------------------------|-------------------|
|                                            |                     | Average CC <sub>50</sub> ( $\mu\text{M}$ ) | $\sigma/\sigma^*$ |
| Average CC <sub>50</sub> ( $\mu\text{M}$ ) | Pearson Correlation | 1.000                                      | -0.501            |
|                                            | Sig. (2-tailed)     |                                            | 0.021             |
|                                            | N*                  | 21                                         | 21                |
| $\sigma/\sigma^*$                          | Pearson Correlation | -0.501                                     | 1.000             |
|                                            | Sig. (2-tailed)     | 0.021                                      |                   |
|                                            | N*                  | 21                                         | 21                |

\*N= Number of samples

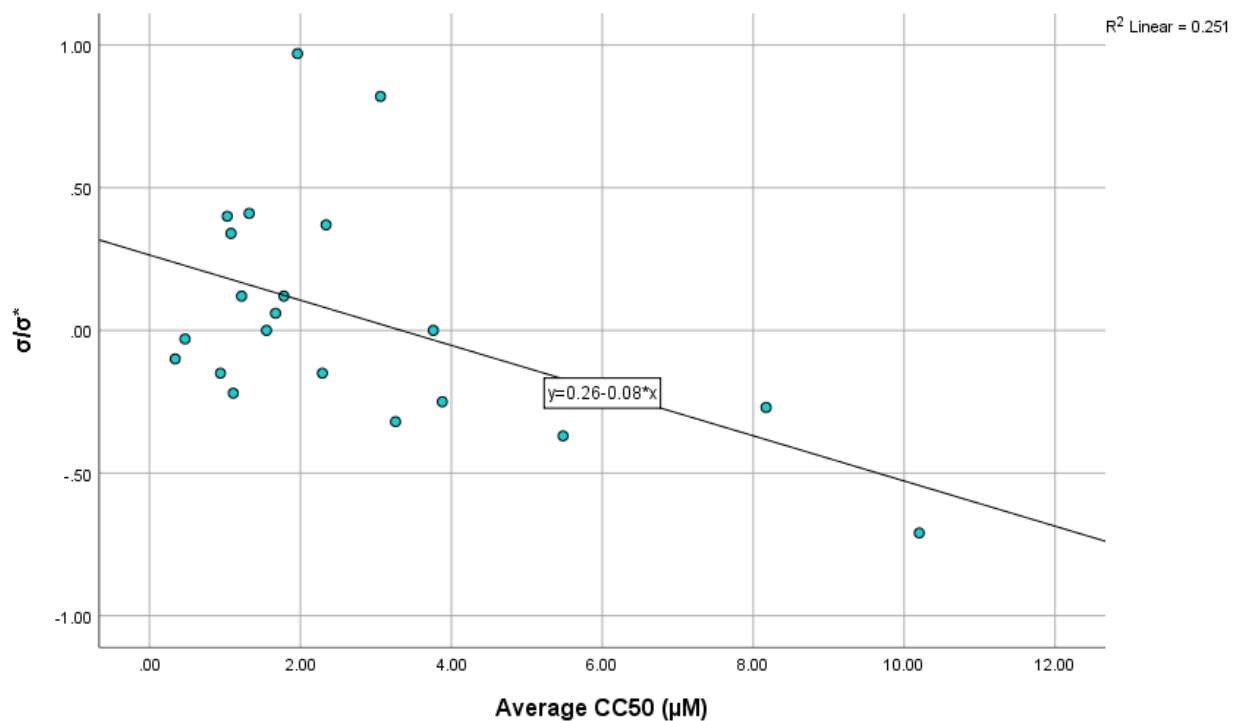

**Figure S4.** Linear determinations between the average CC<sub>50</sub> values (in  $\mu\text{M}$ ) and  $\pi$ .

| Correlations                               |                     |        |                                            |
|--------------------------------------------|---------------------|--------|--------------------------------------------|
|                                            |                     | $\pi$  | Average CC <sub>50</sub> ( $\mu\text{M}$ ) |
| $\pi$                                      | Pearson Correlation | 1.000  | -0.169                                     |
|                                            | Sig. (2-tailed)     |        | 0.464                                      |
|                                            | N*                  | 21     | 21                                         |
| Average CC <sub>50</sub> ( $\mu\text{M}$ ) | Pearson Correlation | -0.169 | 1.000                                      |
|                                            | Sig. (2-tailed)     | 0.464  |                                            |
|                                            | N*                  | 21     | 21                                         |

\*N= Number of samples

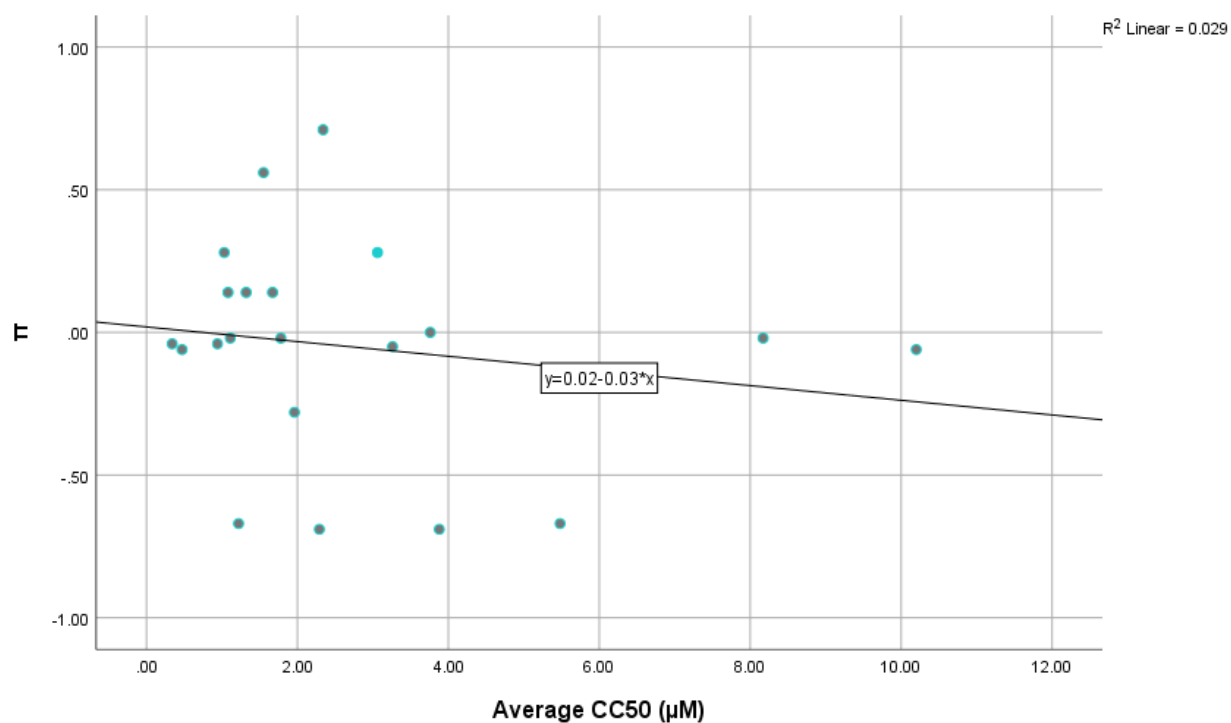

**Figure S5.** Linear determinations between the average CC<sub>50</sub> values (in µM) and MR.

| Correlations                  |                     |                               |       |
|-------------------------------|---------------------|-------------------------------|-------|
|                               |                     | Average CC <sub>50</sub> (µM) | MR    |
| Average CC <sub>50</sub> (µM) | Pearson Correlation | 1.000                         | 0.225 |
|                               | Sig. (2-tailed)     |                               | 0.326 |
|                               | N*                  | 21                            | 21    |
| MR                            | Pearson Correlation | 0.225                         | 1.000 |
|                               | Sig. (2-tailed)     | 0.326                         |       |
|                               | N*                  | 21                            | 21    |

\*N= Number of samples

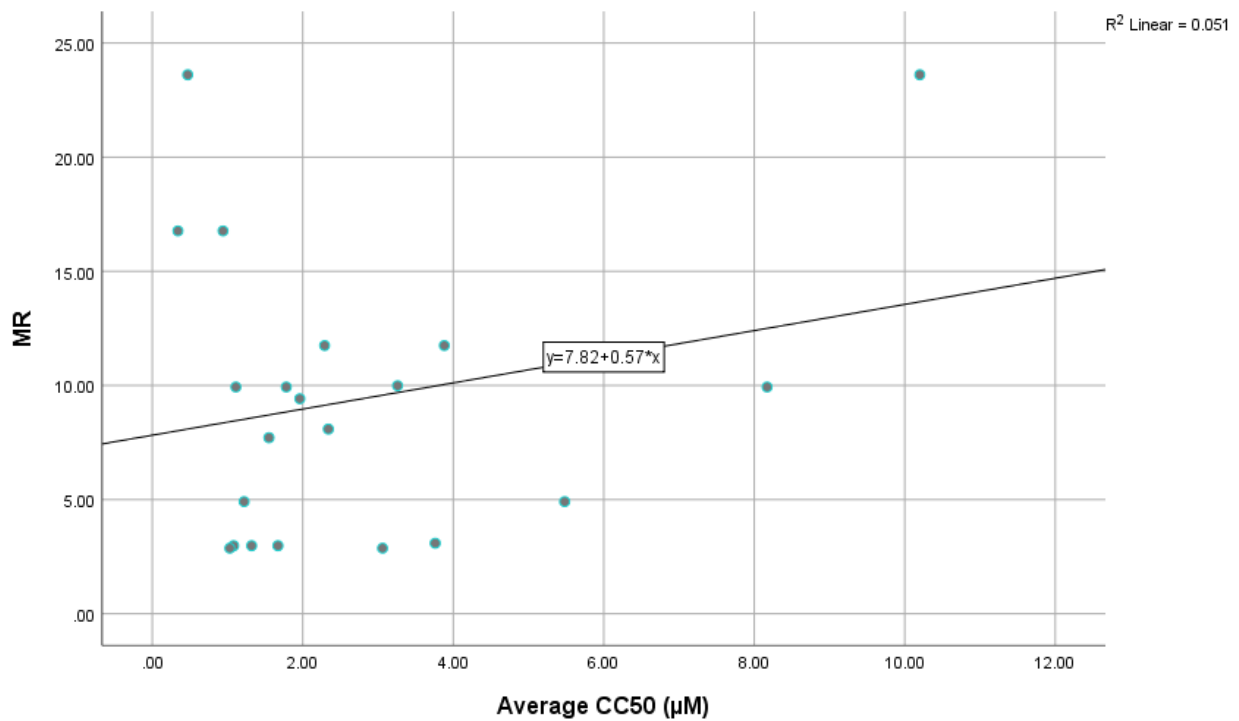

**Figure S6.** Semilogarithmic determinations between the average CC<sub>50</sub> values (in  $\mu\text{M}$ ) and  $\sigma/\sigma^*$

| Correlations                                |                     |                   |                                             |
|---------------------------------------------|---------------------|-------------------|---------------------------------------------|
|                                             |                     | $\sigma/\sigma^*$ | Log[Avg CC <sub>50</sub> ( $\mu\text{M}$ )] |
| $\sigma/\sigma^*$                           | Pearson Correlation | 1.000             | -0.311                                      |
|                                             | Sig. (2-tailed)     |                   | 0.170                                       |
|                                             | N*                  | 21                | 21                                          |
| Log[Avg CC <sub>50</sub> ( $\mu\text{M}$ )] | Pearson Correlation | -0.311            | 1.000                                       |
|                                             | Sig. (2-tailed)     | 0.170             |                                             |
|                                             | N*                  | 21                | 21                                          |

\*N= Number of samples

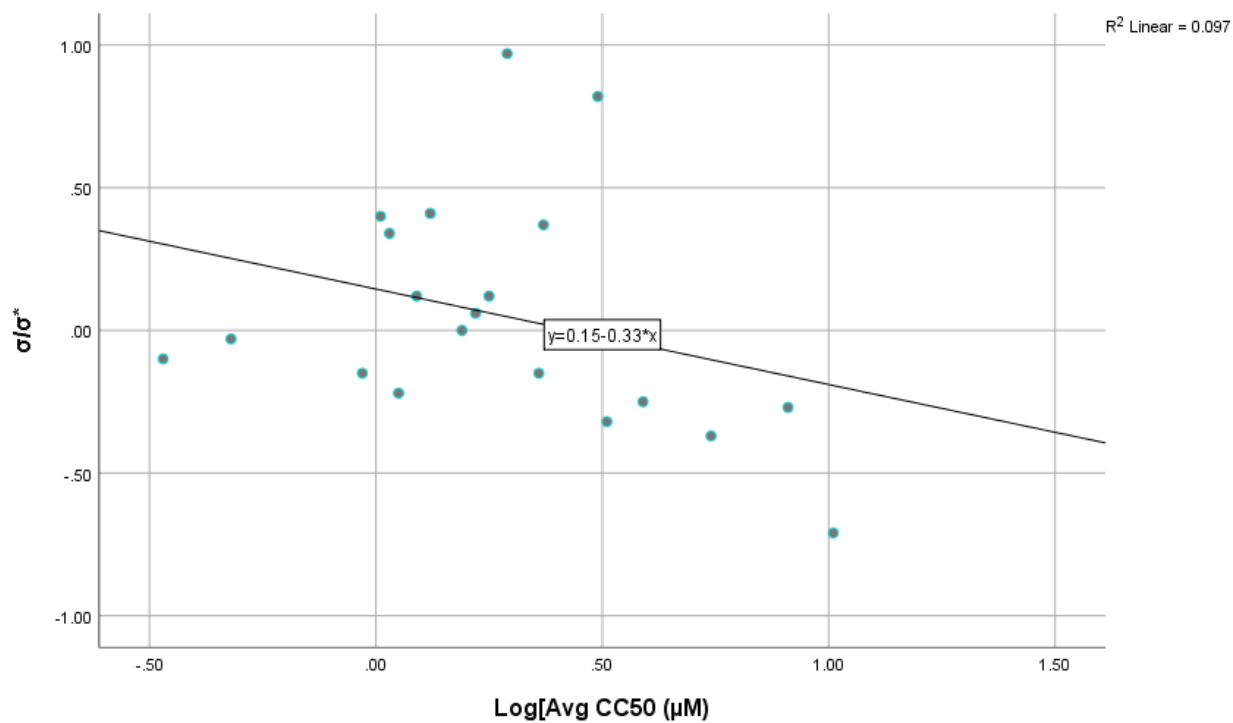

**Figure S7.** Semilogarithmic determinations between the average CC<sub>50</sub> values (in  $\mu\text{M}$ ) and  $\pi$ .

| Correlations                                |                     |                                             |        |
|---------------------------------------------|---------------------|---------------------------------------------|--------|
|                                             |                     | Log[Avg CC <sub>50</sub> ( $\mu\text{M}$ )] | $\pi$  |
| Log[Avg CC <sub>50</sub> ( $\mu\text{M}$ )] | Pearson Correlation | 1.000                                       | -0.178 |
|                                             | Sig. (2-tailed)     |                                             | 0.441  |
|                                             | N*                  | 21                                          | 21     |
| $\pi$                                       | Pearson Correlation | -0.178                                      | 1.000  |
|                                             | Sig. (2-tailed)     | 0.441                                       |        |
|                                             | N*                  | 21                                          | 21     |

\*N= Number of samples

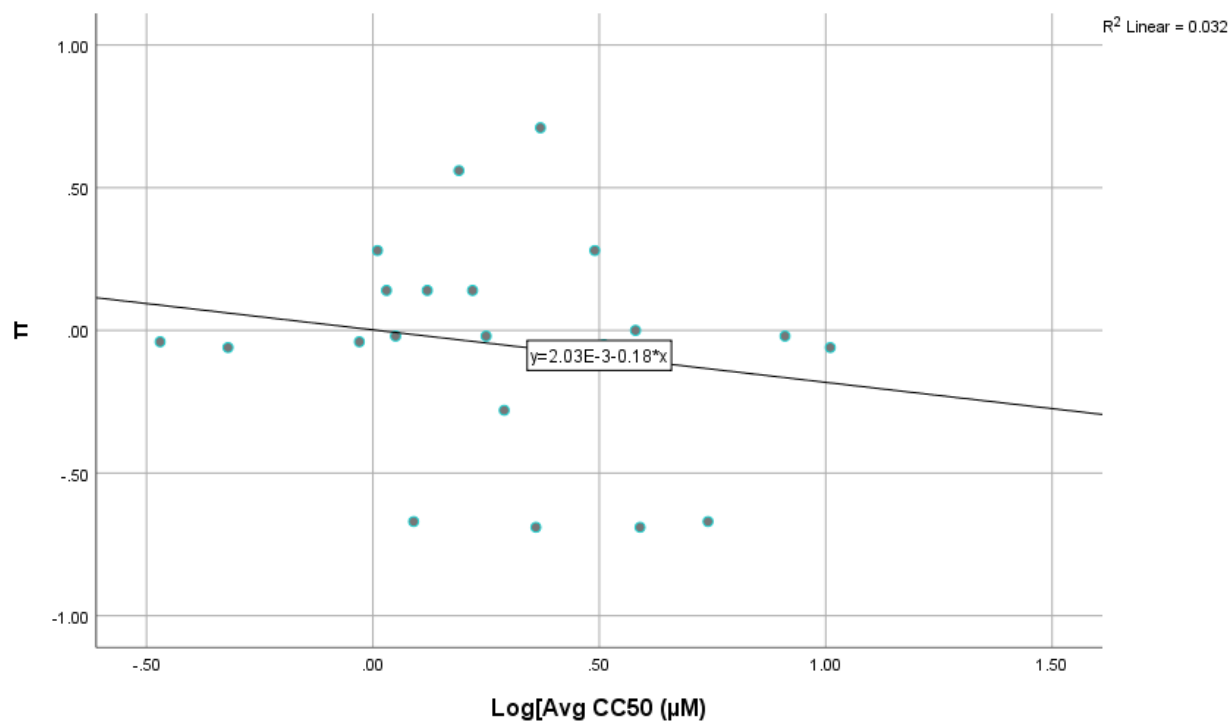

**Figure S8.** Semilogarithmic determinations between the average CC<sub>50</sub> values (in µM) and MR.

| <b>Correlations</b>            |                     |                                |        |
|--------------------------------|---------------------|--------------------------------|--------|
|                                |                     | Log[Avg CC <sub>50</sub> (µM)] | MR     |
| Log[Avg CC <sub>50</sub> (µM)] | Pearson Correlation | 1.000                          | -0.093 |
|                                | Sig. (2-tailed)     |                                | 0.689  |
|                                | N*                  | 21                             | 21     |
| MR                             | Pearson Correlation | -0.093                         | 1.000  |
|                                | Sig. (2-tailed)     | 0.689                          |        |
|                                | N*                  | 21                             | 21     |

\*N= Number of samples

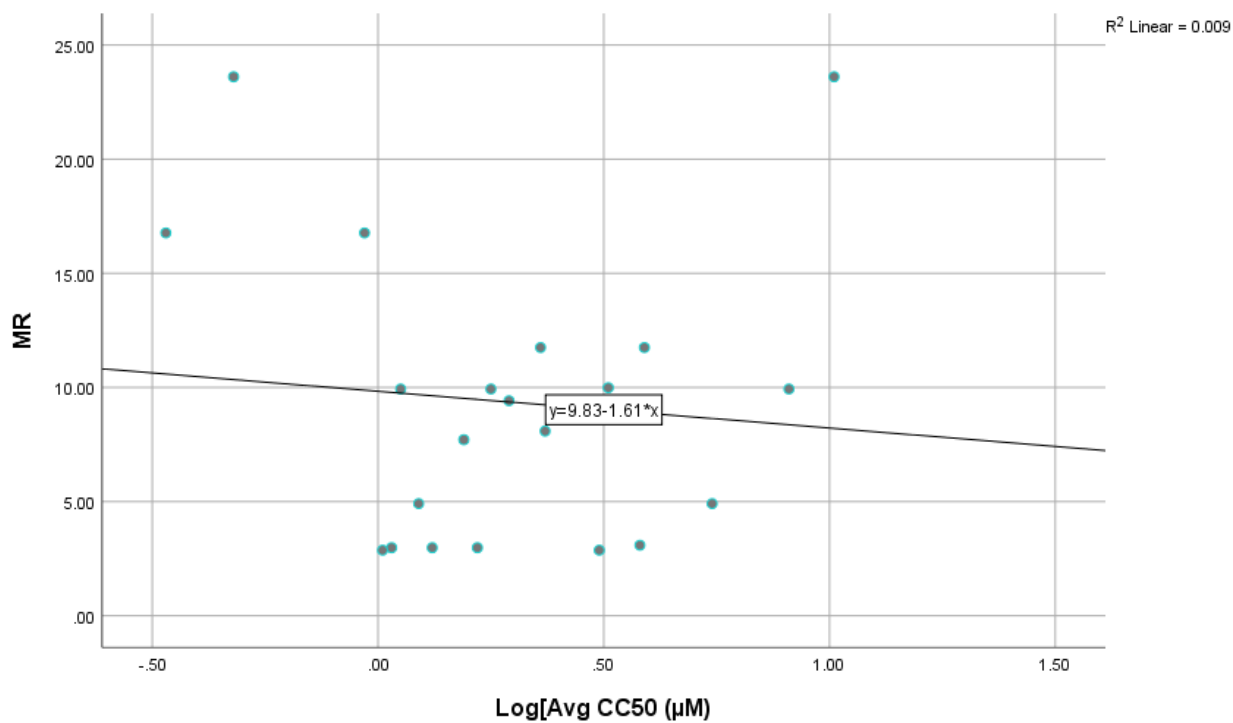

Supplement: s1 [file s1]
